# Supplementary material for: Evaluation of Bacillus velezensis for Biological Control of Rhizoctonia solani in Bean by Alginate/Gelatin Encapsulation Supplemented with Nanoparticles
Source: PubMed Central journal article supplement (PMC9705934; doi:10.4014/jmb.2105.05001), 2021-08-12
Supplement: jmb-31-10-1373-supple.pdf [file jmb-31-10-1373-supple.pdf]

Table ANOVA results of Moisture content (H),  
Encapsulation efficiency (P), Swelling percentage (I)

| Source of variations | df | Mean squares         |                      |                    |
|----------------------|----|----------------------|----------------------|--------------------|
|                      |    | H                    | I                    | P                  |
| d                    | 5  | 127.75 <sup>**</sup> | 536.54 <sup>**</sup> | 1.06 <sup>ns</sup> |
| Error                | 12 | 0.08                 | 54.29                | 1.89               |
| Total                | 17 |                      |                      |                    |

<sup>\*\*</sup> -significant (P < 0.01), ns- not significant.
